1        **tCFS: A new ‘CFS tracking’ paradigm reveals uniform suppression depth**  
2                                    **regardless of target complexity or salience**

3

4     David Alais\*<sup>1</sup>, Jacob Coorey\*<sup>1</sup>, Randolph Blake<sup>2</sup>, Matthew J. Davidson<sup>1</sup>

5     \*Equal contribution.

6     Affiliations:

7     1) School of Psychology, The University of Sydney, Sydney, Australia

8     2) Department of Psychology, Vanderbilt University, Nashville, TN, USA

9

## Abstract

10 When the eyes view separate and incompatible images, the brain suppresses one image  
11 and promotes the other into visual awareness. Periods of interocular suppression can be  
12 prolonged during continuous flash suppression (CFS) - when one eye views a static 'target'  
13 while the other views a complex dynamic stimulus. Measuring the time needed for a  
14 suppressed image to break CFS (bCFS) has been widely used to investigate unconscious  
15 processing, and the results have generated controversy regarding the scope of visual  
16 processing without awareness. Here, we address this controversy with a new 'CFS tracking'  
17 paradigm (tCFS) in which the suppressed monocular target steadily increases in contrast  
18 until breaking into awareness (as in bCFS) after which it decreases until it again disappears  
19 (reCFS), with this cycle continuing for many reversals. Unlike bCFS, tCFS provides a  
20 measure of suppression depth by quantifying the difference between breakthrough and  
21 suppression thresholds. tCFS confirms that: (i) breakthrough thresholds indeed differ across  
22 target types (e.g., faces vs gratings, as bCFS has shown) – but (ii) suppression depth does  
23 not vary across target types. Once the breakthrough contrast is reached for a given stimulus,  
24 all stimuli require a strikingly uniform reduction in contrast to reach the corresponding  
25 suppression threshold. This uniform suppression depth points to a single mechanism of CFS  
26 suppression, one that likely occurs early in visual processing that is not modulated by target  
27 salience or complexity. More fundamentally, it shows that variations in breakthrough  
28 thresholds alone are insufficient for inferring unconscious or preferential processing of given  
29 image categories.

30

31

## Significance statement

32 Research on unconscious vision has proliferated recently, often employing the continuous  
33 flash suppression (CFS) method in which flicker in one eye suppresses the other eye's  
34 image from awareness. That image is strengthened progressively until it breaks into visibility.  
35 Low breakthrough thresholds are claimed to indicate unconscious processing during  
36 suppression. We introduce a method that quantifies breakthrough and also suppression  
37 thresholds, thus providing a lower bound missing from previous CFS research. Comparing  
38 various image types, including those claimed to undergo unconscious processing, all images  
39 show equal suppression when both thresholds are measured. We thus find no evidence of  
40 differential unconscious processing and conclude reliance on breakthrough thresholds is  
41 misleading without considering suppression thresholds and leads to spurious claims about  
42 unconscious processing.

43

## Introduction

44

45         The quest to understand visual processing outside of awareness is tantalising but  
46 notoriously challenging to implement (Breitmeyer, 2015; Hesselmann & Moors, 2015;  
47 Holender, 1986; Logothetis, 1998; Newell & Shanks, 2014; Schmidt, 2015). There are  
48 controversial claims of higher-level semantic processing (Lanfranco et al., 2022; Mudrik et  
49 al., 2014; Stein & Sterzer, 2014; Sterzer et al., 2014), object categorization (Kouider &  
50 Dehaene, 2007; Rees, 2007; Sterzer et al., 2014), and abstract reasoning (Hassin, 2013;  
51 Sklar et al., 2012) occurring outside of awareness. Several methods can be used to  
52 manipulate visual awareness (Kim & Blake, 2005), although interocular suppression in the  
53 form of binocular rivalry (Alais & Blake, 2014) or continuous flash suppression (CFS: (Fang  
54 & He, 2005; Tsuchiya & Koch, 2005) have been popular approaches, with CFS in particular  
55 having recently been very widely used. Interocular suppression arises when dissimilar  
56 images are presented independently to each eye, the result being only one eye's image is  
57 perceived, with the other suppressed. For images approximately matched in saliency, as is  
58 usually the case in binocular rivalry (Alais & Blake, 2014; Wang et al., 2022), monocular  
59 suppression lasts for no more than a few seconds before switching to suppress the other  
60 eye (and so on, alternating irregularly over time). With CFS, a highly salient stream of  
61 dynamic images seen by one eye suppresses a smaller, weaker target presented to the  
62 other for considerably longer periods of suppression that can last tens of seconds. The  
63 potency of CFS has great appeal when it comes to assessing residual effectiveness of  
64 different categories of visual stimuli blocked from awareness by CFS.

65         A commonly used variant known as “breaking CFS” (bCFS) was introduced by (Jiang  
66 et al., 2007) in which the suppressed target slowly ramps up from low contrast until it  
67 becomes sufficiently strong to break suppression and achieve visibility. Time to  
68 breakthrough has become a popular measure, and differences in breakthrough times among  
69 various image types have been used to support claims for unconscious processing of certain  
70 visual images. A shorter time to reach visual awareness is interpreted as evidence of  
71 unconscious processing of an image, or at least a preferential processing of that image. For  
72 example, emotional faces break suppression faster than neutral faces (or non-face) images  
73 (Alais, 2012; Jiang et al., 2007; Tsuchiya et al., 2006; Yang et al., 2007), as do emotionally  
74 relevant images compared to semantically neutral images (Alais, 2012; Jiang et al., 2007;  
75 Tsuchiya et al., 2006; Yang et al., 2007), and native words compared to foreign words (Jiang  
76 et al., 2007). Skeptics argue, however, that differences in breakthrough times can be  
77 attributed to low-level factors which vary between images, such as spatial frequency,  
78 orientation and contrast (Gayet et al., 2014; Moors, 2019; Moors et al., 2016, 2017; Moors &

79 Hesselmann, 2018; Stuit et al., 2023), and more fundamentally, that breakthrough times  
80 alone are insufficient to measure differential unconscious processing (Stein, 2019).

81 Conclusions based on a comparison of bCFS breakthrough times between different  
82 image categories suffer from a problem of unidirectionality and a false assumption of image  
83 equivalence<sup>1</sup>. Images producing faster breakthrough times (equivalently, lower breakthrough  
84 contrasts) are interpreted as undergoing residual processing outside of awareness, adding  
85 to their salience and weakening their interocular suppression (Mudrik et al., 2011; Sterzer et  
86 al., 2011; G. Zhou et al., 2010; W. Zhou et al., 2010)). An implicit assumption here is that as  
87 all images were initially invisible, the depth of interocular suppression was thus weaker for  
88 images with faster reaction times. Yet, the depth of interocular suppression is rarely  
89 measured in CFS paradigms (see Tsuchiya et al., 2006 for an exception), and to our  
90 knowledge, has not been explicitly compared between image categories.

91 One method for measuring interocular suppression is to compare the threshold for  
92 change-detection in a monocularly suppressed or dominant target, as has been established  
93 in binocular rivalry research (Alais, 2012; Alais et al., 2010; Alais & Melcher, 2007; Nguyen  
94 et al., 2003). Suppression depth (or strength) is quantified based on the difference between  
95 detection thresholds during dominance/suppression, which is advantageously standardised  
96 as a relative change in contrast within the same stimulus. Ideally, the change should be a  
97 temporally smoothed contrast increment to the rival image being measured (Alais, 2012),  
98 which provides a natural complement to the linear contrast ramps that are standard in bCFS  
99 research. Here, we measure bCFS thresholds as the analog of change-detection during  
100 suppression, and as their complement, record re-suppression thresholds (reCFS) by  
101 including a bidirectional measure in which the contrast ramp decrements over time,  
102 eventually transitioning the target from dominance to suppression (Figure 1). By comparing  
103 the thresholds for a target to transition into and out of awareness, we recognise that the  
104 criterion for change is much higher, and as a result expect larger suppression depths (on  
105 average) than those recorded in rivalry research. More importantly, however, by averaging  
106 the difference between bCFS and reCFS thresholds, a key analogue of suppression depth  
107 that has been missing from the CFS literature can be provided and compared between  
108 image categories.

109

110 Here, we introduce a novel method termed 'tracking CFS' (tCFS) which combines

---

<sup>1</sup> An exception here is when the same image is compared under different contexts, such as after associative learning of value (Lunghi & Pooresmaeili, 2023) or fear conditioning (Gayet et al., 2016).

111 alternating down-ramped and up-ramped targets, to provide a measure of suppression depth  
112 that allows a more rigorous test of claims that certain images undergo less suppression than  
113 others (see Figure 2). The participant views a visible target as it declines in contrast until  
114 suppressed. When suppression is reported the contrast change reverses direction and the  
115 participant indicates when the target emerges out of dominance and is seen once again  
116 (triggering a contrast decrease again, and so on over many reversals). By continually  
117 tracking thresholds for breakthrough (bCFS) and re-suppression (reCFS) over time, tCFS is  
118 very efficient, makes no assumptions of image equivalence, and provides inherently  
119 bidirectional measures of CFS.

120 To foreshadow our results, across three experiments we find no evidence using the  
121 tCFS paradigm for differences in suppression depth among any of the image categories  
122 tested (e.g., faces, objects, noise). We do replicate the common observation that  
123 breakthrough thresholds differ across image categories, yet re-suppression thresholds were  
124 tightly linked to breakthrough such that suppression exhibited a constant difference (i.e.,  
125 suppression depth) relative to breakthrough threshold. We therefore find no evidence to  
126 support differential unconscious processing among categories of suppressed images.

127

128

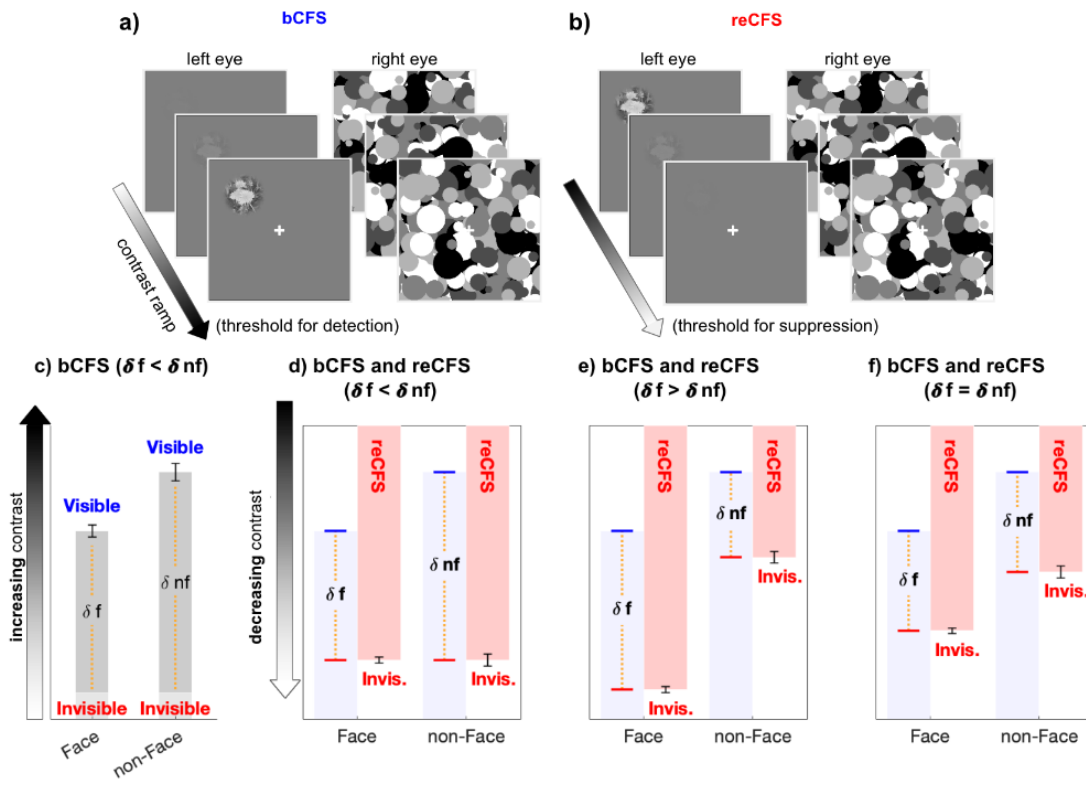

129

130

131 **Figure 1.** The critical measure of suppression depth remains untested in CFS.  
 132 **a,b)** Example stimulus displays for the discrete trials, during which (a) a low-contrast target  
 133 steadily increases in contrast until visibility is reported (bCFS), and (b) discrete reCFS trials,  
 134 with a high-contrast target decreasing until target invisibility is reported. **c)** A typical bCFS  
 135 result, in which a target image (here a face or non face) is initially weak and steadily  
 136 increases until it breaks suppression. Faster breakthrough times (lower contrast) for face  
 137 stimuli are often interpreted as evidence that faces undergo less suppression than non-  
 138 faces. Without also measuring suppression thresholds for each stimulus, this conclusion is  
 139 invalid. **d-f)** To define the magnitude of suppression during CFS, it is necessary to measure  
 140 the contrast thresholds at which stimuli enter and exit from awareness, with the difference  
 141 indicating suppression depth. Red bars display hypothetical results measuring the contrast  
 142 at which an initially visible stimulus with decreasing contrast becomes suppressed by the  
 143 mask (reCFS). The results of panel **c** are reproduced in **d** in light blue. **d)** If the reCFS  
 144 thresholds for face and non-face images are the same, this would support reduced  
 145 suppression depth for faces (as  $\square$  face  $<$   $\square$  non-face). **e)** Alternatively, the reCFS thresholds  
 146 for faces and non-faces might differ, with the face remaining visible at a lower contrast than  
 147 non-face images (lower reCFS threshold), indicating more suppression for faces than non-  
 148 faces (as  $\square$  face  $>$   $\square$  non-face). **f)** Finally, the reCFS thresholds might differ between faces  
 149 and non-faces but by an amount equivalent to their bCFS differences, indicating the same  
 150 suppression depth for both image types (as  $\square$  face  $=$   $\square$  non-face). Such a result would argue  
 151 against enhanced unconscious processing of face stimuli.

152

153

154

155

## General Methods

### 156 **Participants**

157 A total of 36 undergraduate psychology participants volunteered in exchange for  
158 course credit. All participated with informed consent and had normal or corrected-to-normal  
159 vision. Our sample size for Experiment 1 was based on power estimates to detect a  
160 moderate sized effect in a 2 x 2 repeated-measures design (Faul et al., 2009), while also  
161 exceeding the typical sample size used in bCFS studies to compensate for our novel  
162 paradigm (e.g.,  $n = 10$ , Cha et al., 2019,  $n = 10-16$ , Han et al., 2021). We adjusted our  
163 power analysis after observing a strong effect size for the difference between bCFS and  
164 reCFS thresholds when using the tCFS method, resulting in fewer participants in  
165 Experiments 2 and 3. Experiment 1:  $N = 20$ , (15 females), Experiment 2:  $N = 16$  (12  
166 females), Experiment 3,  $N = 15$  (11 females). All participants in Experiment 3 also did  
167 Experiment 2. This study was approved by the University of Sydney Human Research Ethics  
168 Committee (HREC 2021/048).

169

170

171

### **Apparatus**

172 Visual stimuli were displayed on a Mac Pro (2013; 3.7 GHz Quad-Core Intel Xeon  
173 E5) computer, displayed on an Apple LED Cinema monitor (24 inch, 1920 x 1200 pixel  
174 resolution, 60 Hz refresh rate), running OS X El Capitan (10.11.6). All experiments were  
175 programmed using custom MATLAB code, and displayed using Matlab (ver R2017b) and  
176 Psychtoolbox (ver 3.0.13; Brainard et al., 1997). Responses were collected via the left  
177 mouse button of the right hand. A mirror stereoscope was used to partition participant's  
178 vision into separate left- and right-eye views, located approximately 51 cm from the screen,  
179 with a total optical path length of 57 cm.

180

### 181 **Stimuli**

182 Participants dichoptically viewed a high-contrast Mondrian mask pattern (400 x 400  
183 pixels,  $7^\circ \times 7^\circ$ ) with one eye and a small target stimulus (130 x 130 pixels,  $2.2^\circ \times 2.2^\circ$ ) with  
184 the other eye. Two binocularly presented white squares surrounded the mask and served as  
185 a fusion lock to maintain stable fusion, and each eye had a central fixation cross (18 x 18  
186 pixels;  $0.3^\circ \times 0.3^\circ$ ). The Mondrian pattern was greyscale and consisted of overlapping circles  
187 of various sizes and intensities and was updated every fifth video frame (12 Hz). The mask's  
188 RMS contrast ranged between 0.07 and 0.09. As previous research has indicated that  
189 achromatic masks may be optimal to suppress achromatic targets (reviewed in  
190 (Pournaghdali & Schwartz, 2020), we opted for grayscale Mondrian patterns to match our

191 targets.

192 In all experiments targets were viewed by the right eye and were selected at random  
193 from a set that was standardised in RMS contrast (20%) and mean luminance (before  
194 contrast ramping was applied). Target contrast was ramped up or down by scaling the target  
195 image's standard contrast within a range of .02 to 1.0. Importantly, all contrast scaling was  
196 done on a logarithmic scale in decibel units (i.e.,  $\text{conDb} = 20 \times \log_{10}(\text{con})$ ) to make the  
197 changes effectively linear, given the visual system's logarithmic contrast response function.  
198 Minimum (.02) and maximum (1.0) contrast values were thus -33.98 and 0 dB, respectively,  
199 and contrast steps were .07 dB per video frame. In experiment 3, where the rate of target  
200 contrast change was manipulated, the contrast steps were .035, .07, or .105 dB units per  
201 video frame. Target location varied between trials, drawn from a uniform distribution of 200 x  
202 200 pixels centred on the fixation cross.

203

204

## 205 **Procedure**

206 Participants were given practice trials until they were familiar with CFS and the task used in  
207 these experiments. Participants were instructed to respond via mouse click the moment their  
208 subjective visibility of the target stimulus changed (either when a visible target became  
209 suppressed, or when a suppressed target became visible). The phenomenological quality of  
210 reversals may differ between participants (Moors et al., 2017; Zadbood et al., 2011),  
211 however we encouraged participants in the practice session to establish a criteria for target  
212 appearance/disappearance and to maintain it throughout the experiment. In all experiments,  
213 the dependent variable was the target contrast at the moment when a change in target  
214 visibility occurred (either breaking suppression or succumbing to suppression).

215

## 216 **Experiment 1 - Using tCFS to measure suppression depth**

217 Our first experiment was motivated to test for a difference between reCFS and bCFS  
218 thresholds, and to contrast the results obtained when using discrete trials – as is common in  
219 bCFS research, with results from the continuous tracking procedure. We hypothesised that a  
220 difference between bCFS and reCFS thresholds would provide evidence for a contrast range  
221 (i.e., suppression depth) between awareness and suppression, in contrast to the possibility  
222 of a given contrast threshold determining a narrow awareness/suppression border. By  
223 comparing the results between discrete and continuous methods, we sought to establish the  
224 feasibility of collecting multiple thresholds within a single-trial, allowing the rapid  
225 quantification of suppression depth in CFS paradigms. Experiment 1 compared CFS  
226 thresholds for targets increasing in contrast and decreasing in contrast (i.e., bCFS and  
227 reCFS thresholds) in discrete trials and in continuous tracking trials, in a 2 x 2 repeated-



228 measures, within-subjects design. In the discrete conditions, participants completed eight  
229 blocks of eight trials, during which target contrast always changed in one direction - either  
230 increasing from low to high as is typically done in bCFS studies to measure breakthrough  
231 thresholds, or decreasing from high contrast to low to measure a suppression threshold. In  
232 the continuous condition, the target contrast tracked down and up continuously, reversing  
233 direction after each participant response. Continuous trials always began with the target  
234 decreasing from maximum contrast so that the participant's first response was to report  
235 when it disappeared, which caused target contrast to increase until breakthrough was  
236 reported, which caused it to decrease again until suppression, etc.. Continuous trials  
237 terminated after 16 reports of change in target visibility. When the contrast time series is  
238 plotted as shown in Figure 2b, the plot shows eight upper turning points where the target  
239 broke into awareness (bCFS thresholds) and eight lower turning points where the target  
240 became re-suppressed (reCFS thresholds). The order of discrete and continuous blocks was  
241 counterbalanced and randomized across participants. Images for the eight trials of each  
242 block type were drawn from the same set of four faces and four naturalistic objects, with no  
243 repetitions within a block. Before each block began, participants completed a series of  
244 practice trials that utilised an independent set of six images. They were able to complete  
245 practice trials as many times as they wished until they had confidently established  
246 interocular fusion and were comfortable with the requirements of the task.

247

### 248 **Experiment 2 - The effect of image category**

249 Experiment 1 demonstrated that the difference between bCFS and reCFS thresholds  
250 could be quantified rapidly using the tCFS procedure, and that this suppression depth of  
251 images could be quantified in an image-specific manner. In Experiment 2, we tested the  
252 suppression depth obtained for different image categories. Experiment 2 used only the  
253 continuous tracking 'tCFS' method and compared five image types (faces, familiar objects,  
254 linear gratings, phase scrambled images, and polar patterns that were radial lines or  
255 concentric circles). The trials contained 20 reports (10 bCFS and 10 reCFS thresholds) and  
256 the data were analysed in a 5 (image type) x 2 (bCFS vs reCFS thresholds) within-subjects,  
257 repeated-measures ANOVA. There were 10 tracking trials, with each trial containing a single  
258 target image from a subset of ten (two of each image category, randomly ordered for each  
259 participant).

260

### 261 **Experiment 3 - Rate of contrast change on suppression depth**

262 Experiments 1 and 2 introduced the tCFS method and demonstrated a uniformity of  
263 suppression depth across target image categories. This uniformity of suppression depth  
264 could indicate that neural events mediating CFS suppression are not selective for complexity

265 or semantic meaning, and like popular models of binocular rivalry, could instead be based on  
266 low-level reciprocal inhibition and neural adaptation processes (Alais et al., 2010; Kang &  
267 Blake, 2010; McDougall, 1901) suppression depth would be sensitive to the rate of contrast  
268 change of the monocular target. More specifically, based on the adapting mutual inhibition  
269 model, we predicted that at a slower rate of contrast change neural adaptation for the  
270 monocular target would increase, lowering the amount of contrast change necessary to  
271 transition between visibility states. Similarly, a faster rate of target contrast change would  
272 reduce the time for neural adaptation of the monocular target, resulting in an increase in the  
273 required change in contrast necessary to transition a target into and out of awareness.  
274 Expressed in operational terms, the depth of suppression should increase with the rate of  
275 target change, which was the focus of Experiment 3.

276 Experiment 3 used the tCFS method and compared the rate of target contrast  
277 change (slow, medium, fast) across four image categories (faces, objects, linear gratings,  
278 and phase scrambled images). The trials contained 20 reports (10 bCFS and 10 reCFS  
279 thresholds) and the data were analysed in a 3 (contrast change rate) x 4 (image type) x 2  
280 (bCFS vs reCFS thresholds) repeated-measures, within-subjects design. The medium rate  
281 of change was the same as used in Experiments 1 and 2, and the slow and fast rates were  
282 0.5 and 1.5 times the medium rate, respectively. There were 12 tracking trials, given by the  
283 factorial combination of four target image types repeated at the three rates of target contrast  
284 change (in a randomised order for each participant).

285

## 286 **Data Analysis**

287 Data analysis was performed in Matlab (ver R2022a), and SPSS/JASP (ver 28). Initial  
288 inspection identified 1 participant for exclusion (from Experiment 3), based on failure to  
289 follow task instructions. For visualization and analysis, all contrast thresholds are expressed  
290 in decibel units.

291

## 292 **Model Fitting**

293 We additionally quantified the change in relative contrast over time, and evaluated a  
294 series of model fits to describe these data. For this analysis, bCFS and reCFS thresholds  
295 were first averaged within their respective response number, enabling a comparison of  
296 thresholds over the course of each trial. The modelling used the absolute change in contrast  
297 between each sequential threshold in the tracking series as its dependent variable, which we  
298 modelled after detrending, per participant, and at the group level.

299 We compared three basic models to this data. All models were fit with a non-linear  
300 least-squares approximation using a maximum of 400 iterations (lsqcurvefit.m in MATLAB)  
301 The first was a simple cubic polynomial with three free parameters:

302

303 1)  $a x^3 + b x^2 + c x$

304

305 where a, b and c are coefficients for the cubic, quadratic and linear term. We also fit a simple  
306 harmonic oscillator with three free parameters:

307

308 2)  $a x \sin(b x t + c)$

309

310 Where a is amplitude, b is frequency, c is a phase offset, and t is time. We also fit a damped  
311 harmonic oscillator model with four free parameters:

312

313 3)  $a x e^{(-b x t)} x \sin(c x t + d)$ .

314

315 Where a and b describe the amplitude and damping coefficient of decay, and c and d  
316 describe the frequency and phase shift of the oscillatory response.

317 To fit each model, we linearly interpolated between the turning points (thresholds) in  
318 the tCFS time series of each trial to increase the observations to 1000 samples, and  
319 estimated the goodness of each fit through a series of steps. First, we calculated the sum of  
320 squared residual errors for each fit (SSE), and calculated the Bayesian Information Criterion  
321 (BIC) using equation 4:

322

323 4)  $BIC = n x \log(SSE / n) + k x \log(n)$ ;

324

325 Where n represents the number of observations in the dataset, SSE is the sum of squared  
326 errors, and k is the number of parameters in the model. The BIC allows a comparison of  
327 model fits while taking into account the goodness of fit and complexity of each model. It  
328 includes a penalty on the number of parameters in the model by including a term that scales  
329 with the logarithm of sample size. When comparing two models, the model with a lower BIC  
330 is considered favourable, with a change of 0 to 2 BIC as weak evidence in favour, and 6 to  
331 10 as strong evidence in favour (Kass & Raftery, 1995),

332

333

334

## Results

335

### Experiment 1

336

Many previous bCFS studies have shown that *increasing* contrast eventually causes

337 a target image to overcome interocular suppression. To our knowledge, however, none has  
338 investigated the contrast at which an initially visible image succumbs to suppression as its  
339 contrast is *decreased*. Experiment 1 uses the tCFS method to continuously track changes in  
340 target visibility as it rises and falls in contrast. As shown in Figure 2b, this provides a series  
341 of bCFS thresholds (upper turning points) as well as thresholds for the target's re-  
342 suppression (lower turning points: reCFS thresholds). We compare these thresholds to those  
343 obtained with a discrete procedure in which contrast either increased steadily from a low  
344 starting point until breakthrough (standard bCFS measure) or decreased steadily from a high  
345 starting point until suppression was achieved. On each trial the target image was either a  
346 face or a familiar object, with the images all matched in size, RMS contrast and mean  
347 luminance.

348 A repeated-measures ANOVA revealed a significant main effect of threshold, such  
349 that bCFS thresholds were significantly higher than reCFS thresholds ( $F(1,19) = 50.38, p <$   
350  $.001, \eta_p^2 = .73$ ). There was also a significant interaction between threshold and condition  
351 ( $F(1,19) = 41.19, p < .001, \eta_p^2 = .68$ ), indicating that the difference between bCFS and  
352 reCFS thresholds was influenced by whether they were recorded using the discrete trial  
353 procedure or the continuous trial procedure. Subsequent post-hoc tests revealed that bCFS  
354 and reCFS thresholds differed within each type of procedure (Discrete:  $t(19) = 2.89, p =$   
355  $.009, d = 0.65$  Continuous:  $t(19) = 12.12, p < .001, d = 2.7$ ). Overall, the suppression depth  
356 (i.e., the difference between bCFS and reCFS thresholds) was larger with the continuous  
357 procedure ( $M = -15.40$  dB,  $SD = 5.68$ ) compared to discrete procedure ( $M = -5.74$  dB,  $SD =$   
358  $8.89$ ),  $t(19) = 6.42, p < .001$ ). A finding we return to in the Discussion. Figure 2c displays a  
359 summary of these results.

360 After confirming a difference between bCFS and reCFS thresholds, we next  
361 compared suppression depth by image type. We repeated the analysis with the additional  
362 exploratory factor of image type (face vs object) in a  $2 \times 2 \times 2$  repeated-measures design  
363 (threshold, procedure, image type). We again found significant main effects of threshold  
364 ( $F(1,19) = 47.72, p < .001, \eta_p^2 = .72$ ), and a threshold x condition interaction ( $F(1,19) =$   
365  $38.94, p < .001, \eta_p^2 = .67$ ), but no effect of image type ( $p = .57$ ). In other words, there is a  
366 large disparity in contrast between targets breaking CFS and targets re-entering CFS, but  
367 the magnitude of this disparity is the same for objects and for faces. This potentially  
368 important finding is the focus of our next Experiment.

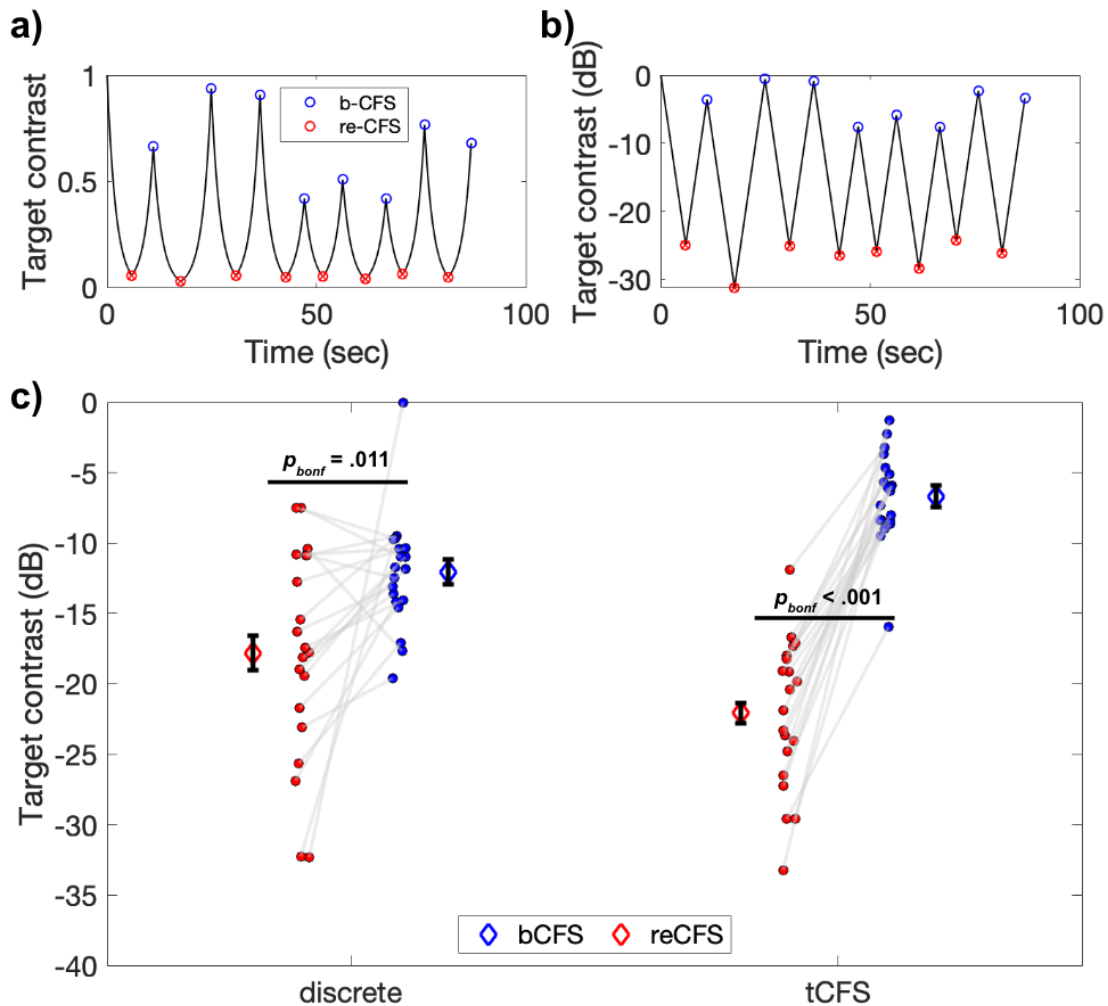

369

370

371 **Figure 2.** Example tCFS trial and comparison to discrete conditions. **a-b)** Example tCFS trial  
372 from one participant, showing the change in contrast over time. Red markers indicate the  
373 level at which a target with decreasing contrast became suppressed (reCFS) and blue  
374 markers indicate traditional bCFS responses (breakthrough of contrast-increasing target).

375 The same trial is shown with target contrast in decibel scale in b. Because the human visual  
376 system has a logarithmic contrast response, it is appropriate to increase/decrease target  
377 contrast logarithmically as in b, to create a contrast change that is perceptually linear. **c)**

378 Interaction between thresholds and condition type. Individual blue and red dots display  
379 participant means for bCFS and reCFS respectively. Grey lines link thresholds per  
380 participant, per condition. Blue and red diamonds display the mean across participants, and  
381 error bars plot  $\pm 1$  SEM corrected for within participant comparisons (Cousineau, 2005).

382

## 383 Experiment 2

384 Experiment 1 disclosed that bCFS thresholds were not equivalent to reCFS  
385 thresholds, and demonstrated that the suppression depth of images could be quantified in  
386 an image-specific manner. Furthermore, Experiment 1 showed that suppression depth could

387 be measured rapidly using the tCFS procedure and did not differ between faces and objects.  
388 In Experiment 2, we tested whether the constant suppression depth obtained in Experiment  
389 1 for two image types would replicate across a larger variety of image categories.

390 We measured suppression depth for faces, objects, linear gratings, phase  
391 scrambled images, and radial/concentric patterns using the tCFS method. All have been  
392 used to investigate bCFS thresholds before (Stein, 2019). We included faces and objects as  
393 representative of salient and complex stimuli. Linear gratings and phase-scrambled images  
394 were used as simple stimuli. Phase-scrambled images were created from the object stimuli  
395 by randomising their FFT phase spectra. It acted as a control for the complex stimuli, devoid  
396 of semantic meaning and image structure while maintaining low-level stimulus content  
397 (Gayet et al., 2014). Finally, polar patterns (radial and concentric gratings) were included as  
398 intermediate stimuli that were globally defined (activating higher visual regions of the ventral  
399 visual stream such as area V4 (Wilkinson et al., 2000)) but lacking in semantic meaning  
400 (Hong, 2015).

401 A 2 x 5 repeated-measures ANOVA revealed a significant main effect of threshold  
402 (bCFS vs reCFS;  $F(1,17) = 133.79$ ,  $p < .001$ ,  $\eta_p^2 = .89$ ), and image type ( $F(4,68) = 13.45$ ,  $p <$   
403  $.001$ ,  $\eta_p^2 = .44$ ). Critically however, there was no significant interaction between thresholds  
404 and image type ( $p = .1$ ), indicating that the relationship between bCFS and reCFS thresholds  
405 was invariant across image categories. This result is plotted in Figure 3, which clearly shows  
406 differences in bCFS thresholds (blue symbols in Figure 3a) over image type (1 x 5 repeated-  
407 measures ANOVA;  $F(4,68) = 16.29$ ,  $p < .001$ ,  $\eta_p^2 = .49$ ), as has been reported in many  
408 studies. Scrambled noise images, for example, have a breakthrough threshold 5.3 dB higher  
409 than face images, and linear gratings breakthrough 3.0 dB higher than polar gratings.  
410 Critically, Figure 3 also shows that reCFS thresholds exhibit the same pattern of differences  
411 over image type (red symbols in Figure 3a), such that there is a constant degree of  
412 suppression depth across all image categories.

413 Replicating the result of Experiment 1, an approximately 15 dB of suppression depth  
414 was observed in Experiment 2 (Fig. 3b), which was practically identical across image types  
415 (Faces,  $M = 14.35$  ( $SD = 5.64$ ); Objects,  $M = 14.61$  ( $SD = 6.07$ ); Gratings,  $M = 14.88$  ( $SD =$   
416  $5.55$ ); phase-scrambled images,  $M = 14.70$  ( $SD = 5.39$ ); polar patterns,  $M = 14.69$  ( $SD =$   
417  $6.50$ ). A repeated-measures ANOVA confirmed that suppression depth did not differ across  
418 image categories ( $F(4,68) = 0.1$ ,  $p = .98$ ).

419  
420  
421

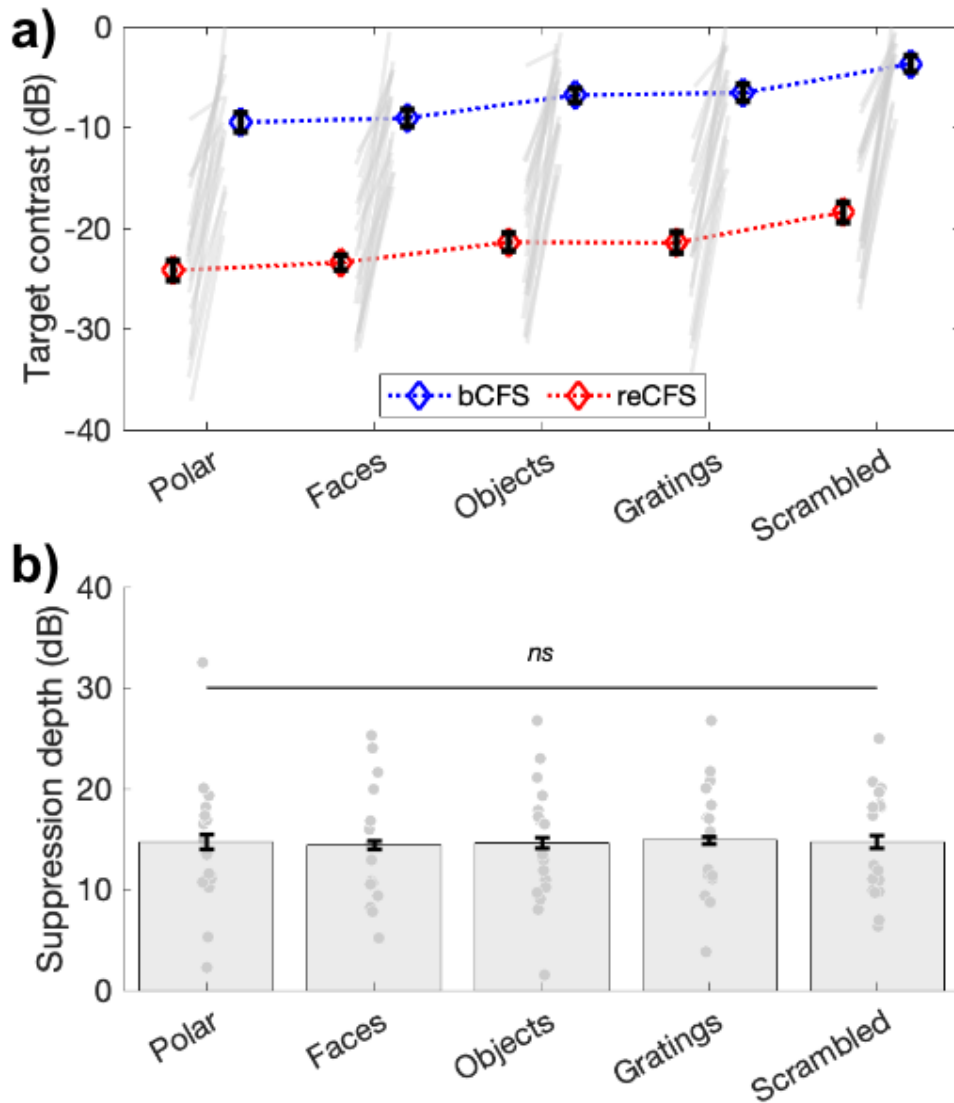

422

423 **Figure 3. Suppression depth is uniform across image categories.** a) bCFS and reCFS  
424 thresholds by image type. Blue and red diamonds display the mean across participants, and  
425 error bars plot  $\pm 1$  SEM corrected for within participant comparisons (Cousineau, 2005). Grey  
426 lines link thresholds per participant, per image type. For visualization, we have linked the  
427 bCFS and reCFS thresholds with broken lines, to better indicate that both do vary according  
428 to image category. b) The difference in contrast between bCFS and reCFS thresholds is the  
429 same across image categories.

430

### 431 Experiment 3

432

433 Experiments 1 and 2 introduced the tCFS method and, using that new method,  
434 demonstrated that bCFS thresholds vary depending on target type, as many previous bCFS  
435 studies have shown. Importantly, reCFS thresholds varied in parallel with bCFS thresholds,  
436 which when expressed in terms of suppression depth, reveals that depth of suppression is  
437 strikingly uniform across target image categories in CFS. This uniformity of suppression depth

438 could indicate that neural events mediating CFS suppression transpire within a common visual  
439 mechanism, one that is not selective for image type, complexity or semantic meaning, over a  
440 wide range of stimulus configurations. This view is compatible with popular models of binocular  
441 rivalry built around the concept of reciprocal inhibition and neural adaptation (Alais et al., 2010;  
442 Kang & Blake, 2010; McDougall, 1901), as well as with more recent Bayesian-inspired inference-  
443 based models in which perceptual alternations in dominance are triggered by accumulating  
444 residual error signal associated with competing stimulus interpretations (Hohwy et al., 2008). As  
445 pointed out elsewhere (Blake, 2022), steadily increasing error signal plays the same role as does  
446 steadily decreasing inhibition strength caused by neural adaptation in reciprocal inhibition  
447 models.

448 In the context of the tCFS method, the steady increases and decreases in the target's  
449 *actual* strength (i.e., its contrast) should impact its emergence from suppression (bCFS) and its  
450 reversion to suppression (reCFS) as it competes against the mask. Whether construed in terms  
451 of neural adaptation or error signal, we surmise that these cycling state transitions defining  
452 suppression depth should be sensitive to the rate of contrast change of the monocular target.  
453 Expressed in operational terms, the depth of suppression should covary with the rate of target  
454 change. Experiment 3 tested this supposition using three rates of contrast change.

455

456 A 3 x 2 x 4 repeated measures ANOVA compared three rates of contrast change  
457 (slow, medium, fast), on both thresholds (bCFS, reCFS) across four image categories (face,  
458 object, grating, phase scrambled) using the tCFS paradigm. There was a significant main  
459 effect of threshold ( $F(1,16) = 116.56, p < .001, \eta_p^2 = .88$ ) again indicating that bCFS and  
460 reCFS contrasts differ. There was also a significant main effect of image type ( $F(3,48) =$   
461  $9.40, p < .001, \eta_p^2 = .37$ ), again with no interaction threshold. This result indicates that bCFS  
462 and reCFS thresholds vary in tandem regardless of image type. Critically, there was a  
463 significant interaction between rate of contrast change and thresholds ( $F(2,32) = 128.60, p <$   
464  $.001, \eta_p^2 = .89$ ), as expected, indicating that the difference between bCFS and reCFS  
465 thresholds (i.e., suppression depth) depended on the target's rate of contrast change.

466 **Figure 4** displays a summary of these results (averaged across image types), showing that  
467 as the rate of contrast change increases, so does suppression depth (Slow  $M = 9.64$  dB,  $SD$   
468  $= 4.37$ , Medium  $M = 14.6$  dB,  $SD = 5.43$ ; Fast  $M = 18.97$  dB,  $SD = 6.93$ ). **Supplementary**  
469 **analyses** confirmed that these differences in suppression depth were not driven by fixed  
470 rates of perceptual alternation across the three levels of rate of contrast change (Figure 4c  
471 and Supplementary Figure 1)



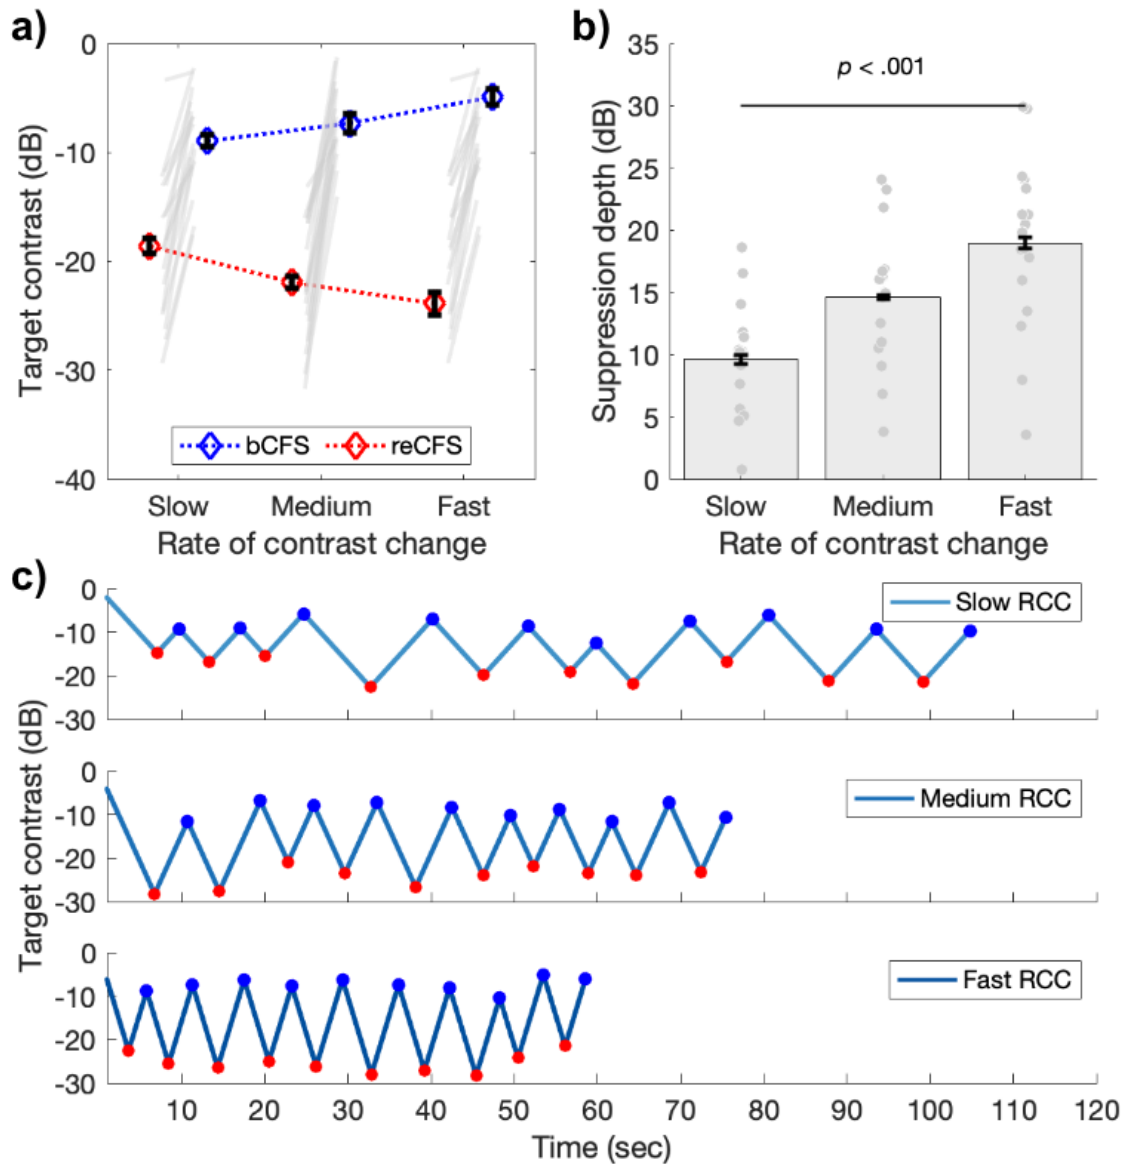

472

473 **Figure 4. Suppression depth is greater with less time for adaptation. a)** bCFS (blue)  
474 and reCFS (red) thresholds collected during tCFS with three rates of contrast change (RCC).  
475 Figure elements are the same as in Figure 3a. **b)** Suppression depth increases when the  
476 rate of contrast change increases during tCFS. All error bars correspond to  $\pm 1$  SEM  
477 corrected for within participant comparisons (Cousineau, 2005). **c)** Example trials at each  
478 rate of contrast change from a single participant. Red markers indicate reCFS responses,  
479 blue markers show bCFS.

480

481 **Perceptual switches during tCFS are described by a damped harmonic oscillator**

482

483 The results of Experiment 3 demonstrated that when the opportunity for target  
484 adaptation is increased, as when the target's rate of contrast change was slow, that  
485 suppression depth is reduced and a smaller contrast decrease is needed for a visible target

486 to reenter CFS (see Figure 4a). One possible account for this relates to the balance of  
487 excitation/inhibition in neural systems, which have been particularly fruitful models of  
488 interocular competition (Alais et al., 2010; Li et al., 2017). In these models, adaptation over  
489 time is a critical parameter governing changes in visual consciousness (Alais et al., 2010),  
490 which motivated us to explore in our final analysis whether suppression depths also  
491 fluctuated over time. Accordingly, our final analysis sought to model the temporal nature of  
492 perceptual switches during tCFS, to understand whether a balance of excitation and  
493 inhibition may be contributing to the sequential contrast thresholds that govern target  
494 visibility.

495 For this analysis, a key dependent variable is the contrast difference between  
496 sequential thresholds (i.e., from bCFS to reCFS, or reCFS to bCFS). As the number of  
497 thresholds was the same in each trial, we averaged each threshold over observers to obtain  
498 a sequence of mean thresholds that preserved the order across the trial. **Figure 5a** displays  
499 the mean result separately for each target rate of change condition. Importantly, pooling  
500 across the threshold order rather than each participant's time series avoids smearing the  
501 data due to observers differing in their perceptual durations (**cf. Supplementary Figure 1**).  
502 To investigate the balance between bCFS and reCFS thresholds, we calculated the absolute  
503 change in contrast between sequential thresholds, as plotted in **Figure 5b**. These sequential  
504 estimates of suppression depth show marked fluctuations early in each trial, followed by a  
505 stabilisation to the grand average suppression depth for each rate of contrast change (Slow  
506 ~10 dB, Medium ~ 15 dB, Fast ~ 19 dB).

507 We next tested whether these sequential changes in suppression depth could be  
508 described by models of excitation and inhibition. For each rate of change condition, we  
509 compared the goodness of fit of three models: a simple harmonic oscillator, a damped  
510 harmonic oscillator, and a cubic polynomial model. We assessed the relative goodness of fit  
511 using the change in Bayesian Information Criterion (BIC) between models (see **Methods**).

512 As can be appreciated in **Figure 5c**, sequential changes in suppression depth were  
513 well described by the damped harmonic oscillator model of excitation and inhibition, which  
514 well captured the modulations early in the trial. For each rate of target contrast change, the  
515 damped harmonic oscillator model was the superior fit to the data (Slow contrast change,  $R^2$   
516 = 0.68, BIC = -1847.2; Medium contrast change,  $R^2$  = 0.63, BIC = -2125.29; Fast contrast  
517 change,  $R^2$  = 0.36, BIC = -1041.29). In each case, the change in Bayesian Information  
518 Criterion between the damped harmonic oscillator and the next best fitting cubic polynomial  
519 model was large (Slow contrast change,  $\Delta$ BIC = -1072.88; Medium contrast change,  $\Delta$ BIC =  
520 -781.5; Fast contrast change,  $\Delta$ BIC = -97.06). Supplementary Table 1 displays the  
521 assessments of each model fit for each rate of change condition.

522 The damped harmonic oscillator has been proposed to capture the response of

523 neural populations governed by excitation/inhibition balance after external perturbation, with  
 524 a given rate of decay. We return to the interpretation of these models in the Discussion.  
 525

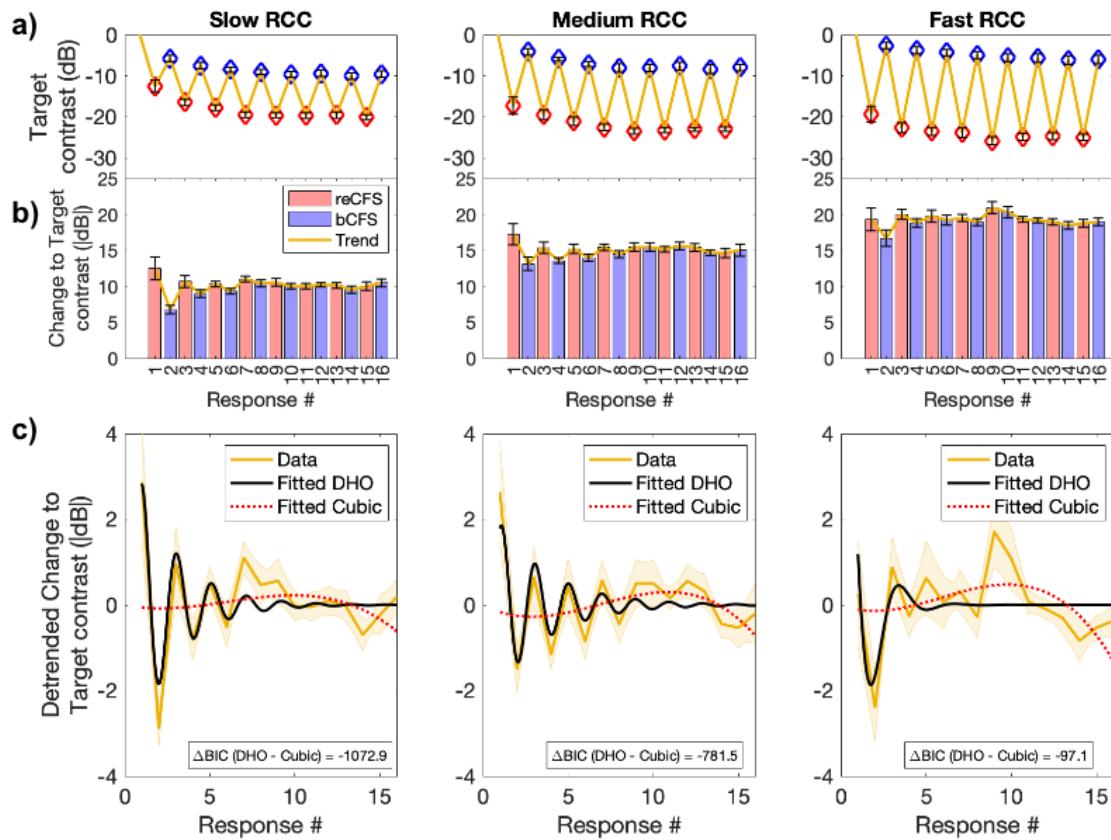

526  
 527  
 528 **Figure 5. Suppression depth over time is well described by a damped harmonic**  
 529 **oscillator. a) Top row:** Mean bCFS (blue) and reCFS (red) thresholds averaged by  
 530 threshold order over the trial. Each column displays the average for slow, medium and fast  
 531 rate of contrast change (RCC), respectively. **b) Middle row.** Absolute change in target  
 532 contrast between successive thresholds (i.e., suppression depth). Red bars indicate the  
 533 decrease in target contrast needed for a visible target to reenter CFS. Blue bars indicate the  
 534 increase in contrast for an invisible target to break CFS. **c) Bottom row:** Yellow lines and  
 535 shading plot the average change in suppression depth between successive thresholds. The  
 536 data in each RCC condition is best fit by a damped harmonic oscillator (DHO) model shown  
 537 in black. The change in Bayesian Information Criterion relative to the next best (cubic  
 538 polynomial) model is displayed in each panel. All error bars and shading denote  $\pm 1$  SEM  
 539 corrected for within participant comparisons (Cousineau, 2005).  
 540

## 541 Discussion

542  
 543 This study introduces a new CFS methodology that efficiently measures suppression  
 544 depth based on a participant's responses to a target continually changing in contrast. In this

545 new 'tracking CFS' method (tCFS), a visible target initially decreases from high contrast until  
546 it is reported as suppressed, then increases in contrast until breakthrough is reported, and  
547 so on in an ongoing cycle. By tracking visibility in this way, the method produces  
548 breakthrough thresholds (as in bCFS), but also suppression thresholds, as the weakening  
549 target reenters suppression (reCFS). By measuring the difference between both thresholds  
550 an image's suppression depth can be quantified, enabling a critical evaluation of whether  
551 previous claims of variations in suppression depth are supported. Experiment 1 introduced  
552 and validated the tCFS method to measure suppression depth. Experiment 2 applied tCFS  
553 to images from different categories and found a constant suppression depth across images,  
554 regardless of stimulus complexity or salience. Experiment 3 manipulated suppression depth  
555 by changing the rate of target contrast change.

556         The tCFS method offers two important advantages. First, it is fast and efficient. The  
557 data in Figure 2b, for example, show that 90 seconds is sufficient to collect a robust set of  
558 data comprising 16 thresholds, eight each for bCFS and reCFS. The second advantage is  
559 that in providing easy quantification of breakthrough and suppression thresholds, tCFS  
560 allows the strength of suppression to be calculated. This point has great theoretical  
561 importance because suppression depth is necessary to evaluate many claims in the CFS  
562 literature about the priority given to certain kinds of images, claims of preserved visual  
563 processing despite suppression, and claims of unconscious processing more generally.  
564 Here, using tCFS on a range of visual image categories, we find no evidence at all that  
565 suppression depth varies based on image category (e.g., faces vs gratings). This finding  
566 forces a reinterpretation of conclusions reached in a number of earlier studies inferring  
567 preserved unconscious processing from differences in breakthrough thresholds alone.

568

569

### 570 **Thresholds for breaking and entering suppression quantify suppression depth**

571         In Experiment 1, we used the tracking CFS method to measure bCFS and reCFS  
572 contrast thresholds, and compared them to those obtained using discrete unidirectional  
573 contrast changes – a series of measures with increasing target contrast to obtain bCFS  
574 thresholds as conventionally done, and also a series with decreasing target contrast to  
575 measure suppression thresholds. For both conditions, a significant difference between bCFS  
576 and reCFS thresholds was observed. This difference indicates that suppression is not a  
577 passive process where a given contrast threshold determines a narrow  
578 awareness/suppression border. Instead, there is a contrast range (i.e., suppression depth)  
579 between awareness and suppression. This is consistent with models of interocular  
580 suppression involving mutually inhibitory left- and right-eye processes. The fact that  
581 binocular rivalry produces a significant suppression depth is well known in that literature

582 (Blake & Camisa, 1979; Nguyen et al., 2003) but is rarely considered in CFS studies<sup>2</sup> where  
583 the focus is typically on the breakthrough threshold for awareness.

584 Intuitively, the average contrast threshold for reCFS should be lower than for bCFS,  
585 yet in the discrete conditions there were some participants who showed the inverse effect ( $n$   
586 = 4; **Figure 2c**). One possibility is that saccades, blinks, or other oculomotor reflexes that  
587 differentially impact transitions during interocular rivalry (van Dam & van Ee, 2006a, 2006b)  
588 might have influenced the discrete bCFS and reCFS trials at separate times. Another  
589 possibility is that by using a blocked design in the discrete trials, a participant's motivation or  
590 attention to task might have changed between bCFS and reCFS blocks. These possibilities  
591 highlight inherent advantages and controls of the tCFS procedure, for which no participant  
592 showed an inverse effect: bCFS and reCFS thresholds are recorded in alternation, thus each  
593 threshold judgment is relative to the previous judgment on the same image. tCFS also helps  
594 maintain a level of engagement as the task is never repeated (bCFS and reCFS tasks  
595 alternate) and long periods of target invisibility that can occur in typical bCFS studies when  
596 the target is raised from near-zero contrast are avoided as target contrast hovers around the  
597 visibility/invisibility thresholds. Alternating between bCFS/reCFS tasks also means that any  
598 adaptation occurring over the trial will occur equivalently for each threshold, as will any  
599 waning of attention. As Figure 2c shows, tCFS produces an increased size of suppression  
600 depth compared to discrete trials. Moreover, it can be administered quickly, and provides  
601 threshold measures with less variance.

602 As an aside, the existence of distinctly different, complementary transition thresholds  
603 for bCFS and reCFS is reminiscent of the behavior termed hysteresis: a property of  
604 dynamical systems wherein output values, rather than being solely governed by  
605 corresponding input values, also exhibit lags or delays based on the valence of continuous  
606 changes in the input values, i.e., a form of memory of preceding states of the system. Other  
607 examples of hysteresis in visual perception include transitions between binocular fusion and  
608 binocular rivalry (Anderson, 1992; Buckthought et al., 2008; Julesz & Tyler, 1976),  
609 perception of motion direction in random-dot cinematograms (Williams et al., 1986), and  
610 repetition priming in perception of bistable configurations (Pastukhov et al., 2015). To  
611 paraphrase Maglio and Polman (Maglio & Polman, 2016), hysteresis can be construed as a  
612 form of memory whereby prior states influence the persistence of current states into the  
613 future.

614

### 615 **No effect of image category on suppression depth**

616 Having demonstrated a difference between bCFS and reCFS thresholds using the

---

<sup>2</sup> An exception to this rule is the study by Tsuchiya et al. (2006) using a briefly presented test probe to compare depth of suppression associated with CFS and BR.

617 tCFS procedure, Experiment 2 compared suppression depth across five different image  
618 categories. A number of previous studies have interpreted a difference in bCFS thresholds  
619 as a difference in suppression depth (Gayet et al., 2014; Jiang et al., 2007; Mudrik et al.,  
620 2011; Yang et al., 2007), yet made no attempt to measure suppression thresholds. We  
621 applied the tCFS method to assess whether bCFS thresholds would differ among image  
622 categories, and whether claimed differences in suppression depth would be obtained when  
623 reCFS thresholds were also measured. Importantly, our bCFS thresholds replicated the  
624 often reported finding that certain image types break into awareness at lower contrasts than  
625 others (see Figure 3a). For example, bCFS thresholds for faces were lower than for phase-  
626 scrambled images by 5.3 dB. Critically, however, while bCFS thresholds varied with image  
627 type, the reCFS threshold for all images was approximately 15 dB lower than bCFS,  
628 *regardless of image type*. In other words, all images produced a constant suppression depth  
629 of about 15 dB (see Fig. 3b), even though their bCFS thresholds varied.

630 It's natural to wonder whether this non-selectivity of CFS depth of suppression  
631 applies to binocular rivalry suppression, too. Blake and Fox (Blake & Fox, 1974) concluded  
632 that rivalry suppression is non-selective based on a task where observers were unable to  
633 notice large changes in the spatial frequency or orientation of a suppressed grating. On the  
634 other hand, Alais and Melcher (Alais & Melcher, 2007) found that the detectability of a brief,  
635 monocular probe presented to an eye during rivalry varied depending on the 'complexity'  
636 (e.g., grating vs face) of the stimulus being probed, with suppression being greater for  
637 complex images. Tsuchiya et al. (Tsuchiya et al., 2006) found that detection of a brief test  
638 probe was much more difficult to detect when presented to an eye during suppression  
639 phases of CFS compared to binocular rivalry. In a similar vein, durations of suppression  
640 phases associated with CFS are considerably longer than those associated with rivalry (15x  
641 longer, in the study by Blake et al., 2019). A clear next step will be to apply a variant of the  
642 tCFS paradigm to binocular rivalry, to assess the uniformity of rivalry suppression depth  
643 based on stimulus complexity.

644 An important caveat for interpreting suppression depth during tCFS is that our bCFS  
645 thresholds will be slightly overestimated due to the response time delay (a problem for most  
646 bCFS studies) and the reCFS thresholds will be slightly underestimated. This leads to a  
647 slight inflation of suppression depth. For example, if we assume an average reaction time of  
648 200 ms for appearance and disappearance events, then suppression depth will be inflated  
649 by ~1.68 dB at the rate of contrast change used in Experiments 1 and 2. This cannot  
650 account for suppression depth in its entirety, which was many times larger at approximately  
651 14 dB across image categories. We have no reason to suspect that reaction-times would  
652 differ when reporting on the appearance or disappearance of different image categories  
653 under CFS, and indeed found no significant evidence for an interaction between thresholds

654 and image categories in our analyses. This leaves a constant suppression depth of  
655 approximately 14 dB to be explained, and the value of comparing between image categories  
656 remains. In Experiment 3, the rate of contrast change varied which led to corresponding  
657 changes in suppression depth, which we note could also not be attributed to a reaction-time  
658 delay (Supplementary Figure 1). Using the same assumptions of a 200 ms response time  
659 delay on average, when the rate was halved (slow condition) or increased by 50% (fast  
660 condition), we would expect response time effects on suppression depth of 0.84 and 2.52  
661 dB, respectively. However, the changes in suppression depth attributable to rates of contrast  
662 change measured in Experiment 3 were far larger than this at 5.8 (slow) and 4.0 dB (fast).

663 Previous research has attributed faster CFS breakthrough (equivalently, lower  
664 contrast) to unconscious processing of suppressed images (Gayet et al., 2014; Mudrik et al.,  
665 2011). As the current study found uniform suppression depth for all tested images, even  
666 though bCFS thresholds varied, it is clear that differences in bCFS thresholds alone should  
667 not be interpreted in terms of preferential unconscious processing of semantically relevant  
668 images. Indeed, if image categories such as faces were processed unconsciously, they  
669 reasonably should be harder to re-suppress, and thus have a smaller suppression depth  
670 compared to neutral stimuli (see Figure 1) – which was not the case.

671 As an alternative to lower bCFS thresholds being due to unconscious processing of  
672 images with relevant semantic content, it may be that such images (here, faces and objects)  
673 break suppression at lower contrasts because they tend to rate highly in low-level image  
674 characteristics that contribute to image salience. Faces and objects will be more salient due  
675 to peaks in local image contrast (Parkhurst & Niebur, 2004), contour integration (Kapadia et  
676 al., 2000), closed curvilinear form (concavity: (Schmidtman et al., 2015), phase aligned  
677 spatial frequency spectra (Maehara et al., 2009), all of which would combine to make real-  
678 world images such as faces and objects more salient to early vision than linear gratings and  
679 scrambled noise and thus lead to lower bCFS thresholds in ways unrelated to semantic  
680 content. Others have pointed to this possibility before (Gayet et al., 2014; Moors, 2019;  
681 Moors et al., 2016, 2017; Moors & Hesselmann, 2018) and it appeals on the grounds of  
682 parsimony, yet an empirical means to quantify suppression depth has been missing. tCFS  
683 now provides a method to easily measure suppression depth and as these experiments  
684 show, once the bCFS threshold is determined, reCFS thresholds reveal a constant level of  
685 suppression depth. Different bCFS thresholds, therefore, cannot be taken to indicate  
686 different levels of suppression and unconscious processing, and thus favour an account  
687 based on low-level image features.

688 Some caution is warranted here, however. It is not clear that all variation in bCFS  
689 thresholds can be explained by low-level image properties. There may be important high-  
690 level factors that also contribute to the salience of a given target image that make it visible at

691 lower contrasts than other images (Gayet et al., 2014; Jiang et al., 2007; Mudrik et al., 2011;  
692 Yang et al., 2007). For example, faces provide essential social information and we are very  
693 highly attuned to them. Face images may therefore be salient at lower contrasts than other  
694 images, such as random noise. Thus, without attributing any special access to awareness or  
695 partial processing during suppression, faces may simply have a higher effective contrast and  
696 become visible at lower contrasts, as seen in the lower bCFS face thresholds we report. A  
697 hybrid-model might therefore be needed for a full account of CFS, similar to those proposed  
698 for binocular rivalry (Cao et al., 2021; Wilson, 2003). Based on our results here, we imagine  
699 a hybrid model in which relative suppression depth for a given image arises from a low-level  
700 interocular mutual inhibition acting equivalently on any kind of image (yielding the uniform  
701 suppression depth we observe), and the absolute level of breakthrough threshold could be  
702 modulated down based on the degree of high-level salience. Careful manipulation of low-  
703 and high-level properties, in combination with the tCFS method, would be able to test this  
704 model (see *Future directions* below).

705

#### 706 **Suppression depth is modulated by rate of contrast change**

707 Experiment 3 varied the rate of target contrast change with the expectation that this  
708 would alter the magnitude of adaptation during tCFS. We predicted that a faster contrast  
709 change would reduce the opportunity for adaptation to accrue, thereby requiring a greater  
710 change in contrast to overcome suppression during CFS. Similarly, a slower rate of change  
711 should increase the opportunity for adaptation, resulting in the inverse effect. We observed  
712 strong modulations of suppression depth based on the rate of contrast change, confirming  
713 these predictions (**Figure 4**). Follow-up analyses confirmed that all three rates of contrast  
714 change had distinct percept duration times (**Supplementary Figure 1**), indicating that the  
715 differences in suppression depth we observed were not due to an artefact such as  
716 participants responding with a fixed inter-response interval, which would spuriously increase  
717 suppression depth for a fast rate of change.

718

#### 719 **Damped harmonic oscillator model**

720 We modelled the changes in contrast between successive bCFS and reCFS  
721 thresholds over a trail and found that a damped harmonic oscillator (DHO) provided an  
722 excellent fit to these sequential estimates of suppression depth. The applicability of this  
723 model is noteworthy for a number of reasons. First, in neuroscience, the DHO model  
724 provides a valuable mathematical framework for understanding the dynamics of neural  
725 systems and their responses to external stimuli, particularly with regard to the interplay  
726 between excitation and inhibition (Freeman, 1961; Hodgkin & Huxley, 1952; Spyropoulos et  
727 al., 2022). In the present context, the high starting contrast of the suprathreshold target in



728 tCFS trials is analogous to the external perturbation. The asymptotic differences in  
729 thresholds over time are reminiscent of both earlier (Wilson, 2003), and more recent  
730 computational models (Cao et al., 2021) of interocular competition, models proposing that  
731 changes to visual awareness are driven by an out-of-equilibrium cortical network. We note  
732 that the locus of competing neural ensembles could reside in early visual stages (Alais et al.,  
733 2010; Lankheet, 2006; Li et al., 2017), late stages (Hohwy et al., 2008) or across hierarchical  
734 (Cao et al., 2021; Wilson, 2003) levels of visual processing. Although it is beyond the scope  
735 of the present work, future studies could vary the starting conditions of the tCFS procedure,  
736 or manipulate higher-order influences such as attention and expectation to examine whether  
737 the return to equilibrium we have revealed conforms to the predictions of competing models.

738

739

#### 740 **Future Directions**

741 The tCFS method equips researchers with a convenient method to measure bCFS and  
742 reCFS thresholds, and thus suppression depth. We have used tCFS here to establish that a  
743 uniform suppression depth exists across image categories, and that differences in bCFS  
744 thresholds alone cannot provide strong evidence for unconscious processing. Many  
745 substantive questions remain. For example, the depth of interocular suppression is reported  
746 to partially depend on spatial feature similarity between the competing images (Alais &  
747 Melcher, 2007; Drewes et al., 2023) and their temporal frequency (Han et al., 2018; Han &  
748 Alais, 2018). These factors could be parametrically varied to examine specifically whether  
749 they modulate bCFS thresholds alone, or whether they also cause a change in suppression  
750 depth by asymmetrically affecting reCFS thresholds. Previous findings can easily be  
751 revisited, such as results showing that bCFS varies with manipulations of semantic content  
752 (e.g., face inversion, or manipulating a face's emotion), results which form part of the  
753 claimed evidence for preferential unconscious processing of certain suppressed images.

754

#### 755 **Conclusion**

756 Across three experiments we have introduced the tCFS method and shown that  
757 traditional evidence for unconscious processing – based on differences in the threshold to  
758 reach awareness (bCFS threshold) – provide only half the story. Misleading conclusions  
759 about unconscious processing must be supported by measures of suppression depth, which  
760 can be calculated as the difference between both breakthrough (bCFS) and suppression  
761 (reCFS) thresholds. Using the tCFS method we have measured these thresholds, and found  
762 uniform suppression depth across five image five categories. Notably, this uniform  
763 suppression depth is increased with reduced opportunity for target image adaptation, as is  
764 the case when target contrast changes rapidly. Collectively, the three tCFS experiments

765 refute existing claims of high-level semantic information or target complexity influencing the  
766 depth of unconscious processing during interocular suppression. Future findings may yet  
767 confirm differences in suppression depth in certain circumstances, yet this will require  
768 measurement of both breakthrough and suppression thresholds to demonstrate the requisite  
769 changes in suppression depth.

770

771

772 **Supplementary Material.**

773

774 We performed additional analyses to rule out an alternative explanation for the  
775 increased suppression durations demonstrated in Experiment 3. We reasoned that if  
776 alternations between bCFS and reCFS were happening with a regular periodicity, such that  
777 responses were made every 1 second (for example), then these consistent responses could  
778 result in smaller suppression thresholds when the rate of contrast change was slow, as we  
779 have observed. Similarly, larger suppression thresholds would be measured if the same 1  
780 second interval had elapsed while the rate of contrast change was fast. Inspection of the raw  
781 tCFS time-series qualitatively indicated that perceptual durations were varying with the rate  
782 of target contrast change (**Figure 4c**). To test this possibility, we compared the group  
783 average perceptual durations across all experiments, to test whether the average duration of  
784 percepts was the same despite different rates of contrast change. **Supplementary Figure 1**  
785 displays the results of this analysis. The histograms of perceptual durations for Experiments  
786 1 (all tCFS median  $M = 3.83$ ,  $SD = 1.66$ ) and Experiment 2 ( $M = 3.48$ ,  $SD = 1.36$ ) show  
787 similar means and distributions, with no significant difference between them ( $t(36) = 0.72$ ,  $p$   
788  $= .48$ ). This is unsurprising given their similar design and matched rate of contrast change. In  
789 Experiment 3, however, the distribution of percept durations is shown to vary by rate of  
790 contrast change. With shorter median percept durations for fast rates of contrast change ( $M =$   
791  $3.08$ ,  $SD = 1.07$ ), and slower percept durations for slow rates of contrast change ( $M =$   
792  $4.61$ ,  $SD = 2.05$ ) compared to medium ( $M = 3.45$ ,  $SD = 1.29$ ). A repeated measures  
793 ANOVA confirmed that median percept durations varied by rate of contrast change ( $F(2,32)$   
794  $= 30.89$ ,  $p < .001$ ,  $\eta_p^2 = .66$ ).

795

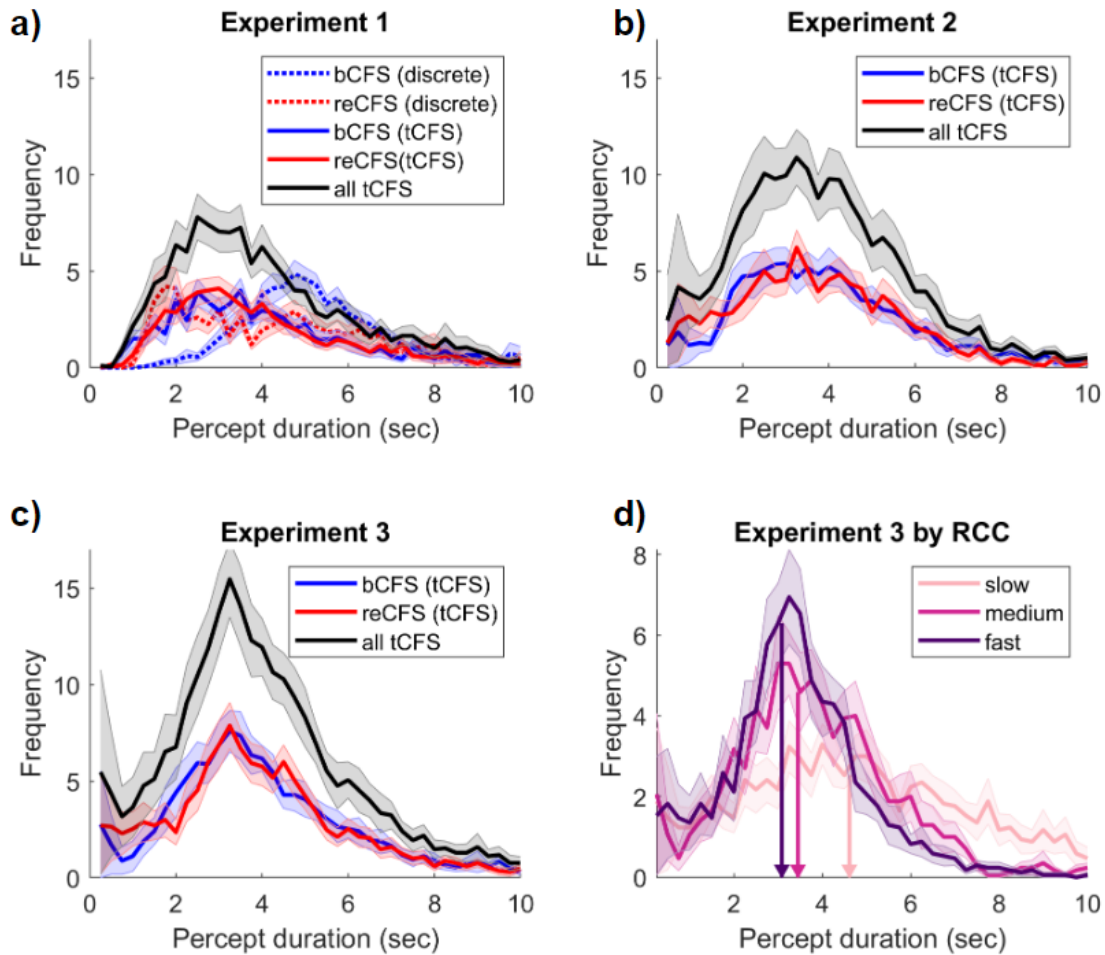

796

797

**Supplementary Figure 1. Perceptual durations in Experiments 1 to 3. a)** Average

798 histogram across participants for all percept durations by experimental condition. Solid lines

799 show tCFS conditions, broken lines show discrete (unidirectional) conditions. Shading

800 corresponds to  $\pm 1$  SEM corrected for within participant comparisons (Cousineau, 2005). **b-c)**

801 Average histograms for tCFS in Experiment 2, and Experiment 3, respectively. Figure

802 conventions as in a). **d)** tCFS durations of Experiment 3 when split by rate of contrast

803 change. Vertical lines and arrows indicate the mean of median percept durations across

804 participants.

805

806

807

|                   |                | <u>Slow RCC</u> | <u>Medium RCC</u> | <u>Fast RCC</u> |
|-------------------|----------------|-----------------|-------------------|-----------------|
| <b>Model</b>      | <b>Measure</b> |                 |                   |                 |
| (cubic) 1         | $R^2$          | .07             | .19               | .29             |
|                   | BIC            | -774.31         | 1343.79           | -944.23         |
| (harmonic) 2      | $R^2$          | .005            | .006              | 0               |
|                   | BIC            | -706.85         | 1138.595          | -600.34         |
| (dHO) 3           | $R^2$          | .684            | .632              | .361            |
|                   | BIC            | -1847.19        | -2125.29          | -1041.29        |
| <b>Comparison</b> |                |                 |                   |                 |
| 2-1               | $\Delta$ BIC   | 67.46           | 205.195           | 343.89          |
| 3-1               | $\Delta$ BIC   | -1072.88        | -781.5            | -97.06          |
| 3-2               | $\Delta$ BIC   | -1140.34        | -986.695          | -440.95         |

808

809 **Supplementary Table 1.** Summary of results from model fits and comparisons.

810

811

## References

812  
813

- 814 Alais, D. (2012). Binocular rivalry: competition and inhibition in visual perception. *Wiley*  
815 *Interdisciplinary Reviews. Cognitive Science*, 3(1), 87–103.
- 816 Alais, D., & Blake, R. (2014). Binocular rivalry and perceptual ambiguity. In J. Wagemans  
817 (Ed.), *Oxford Handbook of Perceptual Organization*. Oxford University Press.
- 818 Alais, D., Cass, J., O’Shea, R. P., & Blake, R. (2010). Visual sensitivity underlying changes  
819 in visual consciousness. *Current Biology: CB*, 20(15), 1362–1367.
- 820 Alais, D., & Melcher, D. (2007). Strength and coherence of binocular rivalry depends on  
821 shared stimulus complexity. *Vision Research*, 47(2), 269–279.
- 822 Anderson, B. L. (1992). Hysteresis, cooperativity, and depth averaging in dynamic random-  
823 dot stereograms. *Perception & Psychophysics*, 51(6), 511–528.
- 824 Blake, R. (2022). The Perceptual Magic of Binocular Rivalry. *Current Directions in*  
825 *Psychological Science*, 31(2), 139–146.
- 826 Blake, R., & Camisa, J. (1979). On the inhibitory nature of binocular rivalry suppression.  
827 *Journal of Experimental Psychology. Human Perception and Performance*, 5(2), 315–  
828 323.
- 829 Blake, R., & Fox, R. (1974). Binocular rivalry suppression: insensitive to spatial frequency  
830 and orientation change. *Vision Research*, 14(8), 687–692.
- 831 Breitmeyer, B. G. (2015). Psychophysical “blinding” methods reveal a functional hierarchy of  
832 unconscious visual processing. *Consciousness and Cognition*, 35, 234–250.
- 833 Buckthought, A., Kim, J., & Wilson, H. R. (2008). Hysteresis effects in stereopsis and  
834 binocular rivalry. *Vision Research*, 48(6), 819–830.
- 835 Cao, R., Pastukhov, A., Aleshin, S., Mattia, M., & Braun, J. (2021). Binocular rivalry reveals  
836 an out-of-equilibrium neural dynamics suited for decision-making. *eLife*, 10, e61581.
- 837 Cousineau, D. (2005). Confidence intervals in within-subject designs: A simpler solution to  
838 Loftus and Masson’s method. *Tutorials in Quantitative Methods for Psychology*, 1(1),  
839 42–45.

- 840 Drewes, J., Witzel, C., & Zhu, W. (2023). Feature-based interaction between masks and  
841 target in continuous flash suppression. *Scientific Reports*, *13*(1), 4696.
- 842 Fang, F., & He, S. (2005). Cortical responses to invisible objects in the human dorsal and  
843 ventral pathways. *Nature Neuroscience*, *8*(10), 1380–1385.
- 844 Faul, F., Erdfelder, E., Buchner, A., & Lang, A.-G. (2009). Statistical power analyses using  
845 G\*Power 3.1: tests for correlation and regression analyses. *Behavior Research*  
846 *Methods*, *41*(4), 1149–1160.
- 847 Freeman, W. J. (1961). Harmonic Oscillation as Model for Cortical Excitability Changes with  
848 Attention in Cats. *Science*, *133*(3470), 2058–2059.
- 849 Gayet, S., Paffen, C. L. E., Belopolsky, A. V., Theeuwes, J., & Van der Stigchel, S. (2016).  
850 Visual input signaling threat gains preferential access to awareness in a breaking  
851 continuous flash suppression paradigm. *Cognition*, *149*, 77–83.
- 852 Gayet, S., Van der Stigchel, S., & Paffen, C. L. E. (2014). Breaking continuous flash  
853 suppression: competing for consciousness on the pre-semantic battlefield. *Frontiers in*  
854 *Psychology*, *5*, 460.
- 855 Han, S. 'er, & Alais, D. (2018). Strength of continuous flash suppression is optimal when  
856 target and masker modulation rates are matched. *Journal of Vision*, *18*(3), 3.
- 857 Han, S. 'er, Blake, R., & Alais, D. (2018). Slow and steady, not fast and furious: Slow  
858 temporal modulation strengthens continuous flash suppression. *Consciousness and*  
859 *Cognition*, *58*, 10–19.
- 860 Hassin, R. R. (2013). Yes It Can: On the Functional Abilities of the Human Unconscious.  
861 *Perspectives on Psychological Science: A Journal of the Association for Psychological*  
862 *Science*, *8*(2), 195–207.
- 863 Hesselmann, G., & Moors, P. (2015). Definitely maybe: can unconscious processes perform  
864 the same functions as conscious processes? *Frontiers in Psychology*, *6*, 584.
- 865 Hodgkin, A. L., & Huxley, A. F. (1952). A quantitative description of membrane current and  
866 its application to conduction and excitation in nerve. *The Journal of Physiology*, *117*(4),  
867 500–544.

- 868 Hohwy, J., Roepstorff, A., & Friston, K. (2008). Predictive coding explains binocular rivalry:  
869 an epistemological review. *Cognition*, *108*(3), 687–701.
- 870 Holender, D. (1986). Semantic activation without conscious identification in dichotic listening,  
871 parafoveal vision, and visual masking: A survey and appraisal. *The Behavioral and*  
872 *Brain Sciences*, *9*(1), 1–23.
- 873 Hong, S. W. (2015). Radial bias for orientation and direction of motion modulates access to  
874 visual awareness during continuous flash suppression. *Journal of Vision*, *15*(1), 15.1.3.
- 875 Jiang, Y., Costello, P., & He, S. (2007). Processing of Invisible Stimuli: Advantage of Upright  
876 Faces and Recognizable Words in Overcoming Interocular Suppression. *Psychological*  
877 *Science*, *18*(4), 349–355.
- 878 Julesz, B., & Tyler, C. W. (1976). Neurontropy, an entropy-like measure of neural correlation,  
879 in binocular fusion and rivalry. *Biological Cybernetics*, *23*(1), 25–32.
- 880 Kang, M.-S., & Blake, R. (2010). What causes alternations in dominance during binocular  
881 rivalry? *Attention, Perception & Psychophysics*, *72*(1), 179–186.
- 882 Kapadia, M. K., Westheimer, G., & Gilbert, C. D. (2000). Spatial distribution of contextual  
883 interactions in primary visual cortex and in visual perception. *Journal of*  
884 *Neurophysiology*, *84*(4), 2048–2062.
- 885 Kass, R. E., & Raftery, A. E. (1995). Bayes Factors. *Journal of the American Statistical*  
886 *Association*, *90*(430), 773–795.
- 887 Kim, C.-Y., & Blake, R. (2005). Psychophysical magic: rendering the visible “invisible.”  
888 *Trends in Cognitive Sciences*, *9*(8), 381–388.
- 889 Kouider, S., & Dehaene, S. (2007). Levels of processing during non-conscious perception: a  
890 critical review of visual masking. *Philosophical Transactions of the Royal Society of*  
891 *London. Series B, Biological Sciences*, *362*(1481), 857–875.
- 892 Lanfranco, R. C., Rabagliati, H., & Carmel, D. (2022). The importance of awareness in face  
893 processing: A critical review of interocular suppression studies. *Behavioural Brain*  
894 *Research*, 114116.
- 895 Lankheet, M. J. M. (2006). Unraveling adaptation and mutual inhibition in perceptual rivalry.



- 896 *Journal of Vision*, 6(4), 304–310.
- 897 Li, H.-H., Rankin, J., Rinzal, J., Carrasco, M., & Heeger, D. J. (2017). Attention model of  
898 binocular rivalry. *Proceedings of the National Academy of Sciences of the United States*  
899 *of America*, 114(30), E6192–E6201.
- 900 Logothetis, N. K. (1998). Single units and conscious vision. *Philosophical Transactions of the*  
901 *Royal Society of London. Series B, Biological Sciences*, 353(1377), 1801–1818.
- 902 Lunghi, C., & Pooresmaeili, A. (2023). Learned value modulates the access to visual  
903 awareness during continuous flash suppression. *Scientific Reports*, 13(1), 756.
- 904 Maehara, G., Huang, P.-C., & Hess, R. F. (2009). Importance of phase alignment for  
905 interocular suppression. *Vision Research*, 49(14), 1838–1847.
- 906 Maglio, S. J., & Polman, E. (2016). Revising probability estimates: Why increasing likelihood  
907 means increasing impact. *Journal of Personality and Social Psychology*, 111(2), 141–  
908 158.
- 909 McDougall, W. (1901). Some New Observations in Support of Thomas Young's Theory of  
910 Light- and Colour-Vision. *Mind; a Quarterly Review of Psychology and Philosophy*,  
911 10(37), 52–97.
- 912 Moors, P. (2019). What's Up with High-Level Processing During Continuous Flash  
913 Suppression? In *Transitions between Consciousness and Unconsciousness* (pp. 39–  
914 70). <https://doi.org/10.4324/9780429469688-2>
- 915 Moors, P., Boelens, D., van Overwalle, J., & Wagemans, J. (2016). Scene Integration  
916 Without Awareness: No Conclusive Evidence for Processing Scene Congruency During  
917 Continuous Flash Suppression. *Psychological Science*, 27(7), 945–956.
- 918 Moors, P., & Hesselmann, G. (2018). A critical reexamination of doing arithmetic  
919 nonconsciously. In *Psychonomic Bulletin & Review* (Vol. 25, Issue 1, pp. 472–481).  
920 <https://doi.org/10.3758/s13423-017-1292-x>
- 921 Moors, P., Hesselmann, G., Wagemans, J., & van Ee, R. (2017). Continuous Flash  
922 Suppression: Stimulus Fractionation rather than Integration. *Trends in Cognitive*  
923 *Sciences*, 21(10), 719–721.

- 924 Mudrik, L., Breska, A., Lamy, D., & Deouell, L. Y. (2011). Integration without awareness:  
925 expanding the limits of unconscious processing. *Psychological Science*, 22(6), 764–770.
- 926 Mudrik, L., Faivre, N., & Koch, C. (2014). Information integration without awareness. *Trends*  
927 *in Cognitive Sciences*, 18(9), 488–496.
- 928 Newell, B. R., & Shanks, D. R. (2014). Unconscious influences on decision making: a critical  
929 review. *The Behavioral and Brain Sciences*, 37(1), 1–19.
- 930 Nguyen, V. A., Freeman, A. W., & Alais, D. (2003). Increasing depth of binocular rivalry  
931 suppression along two visual pathways. *Vision Research*, 43(19), 2003–2008.
- 932 Parkhurst, D. J., & Niebur, E. (2004). Texture contrast attracts overt visual attention in  
933 natural scenes. *The European Journal of Neuroscience*, 19(3), 783–789.
- 934 Pastukhov, A., Vivian-Griffiths, S., & Braun, J. (2015). Transformation priming helps to  
935 disambiguate sudden changes of sensory inputs. *Vision Research*, 116(Pt A), 36–44.
- 936 Pournaghdali, A., & Schwartz, B. L. (2020). Continuous flash suppression: Known and  
937 unknowns. *Psychonomic Bulletin & Review*, 27(6), 1071–1103.
- 938 Rees, G. (2007). Neural correlates of the contents of visual awareness in humans.  
939 *Philosophical Transactions of the Royal Society of London. Series B, Biological*  
940 *Sciences*, 362(1481), 877–886.
- 941 Schmidtman, G., Jennings, B. J., & Kingdom, F. A. A. (2015). Shape recognition:  
942 convexities, concavities and things in between. *Scientific Reports*, 5(1), 1–11.
- 943 Schmidt, T. (2015). Invisible Stimuli, Implicit Thresholds: Why Invisibility Judgments Cannot  
944 be Interpreted in Isolation. *Advances in Cognitive Psychology / University of Finance*  
945 *and Management in Warsaw*, 11(2), 31–41.
- 946 Sklar, A. Y., Levy, N., Goldstein, A., Mandel, R., Maril, A., & Hassin, R. R. (2012). Reading  
947 and doing arithmetic nonconsciously. *Proceedings of the National Academy of*  
948 *Sciences*, 109(48), 19614–19619.
- 949 Spyropoulos, G., Saponati, M., Dowdall, J. R., Schölvink, M. L., Bosman, C. A., Lima, B.,  
950 Peter, A., Onorato, I., Klön-Lipok, J., Roese, R., Neuenschwander, S., Fries, P., &  
951 Vinck, M. (2022). Spontaneous variability in gamma dynamics described by a damped

- 952 harmonic oscillator driven by noise. *Nature Communications*, 13(1), 2019.
- 953 Stein, T. (2019). The breaking continuous flash suppression paradigm. In G. Hesselmann  
954 (Ed.), *Transitions between consciousness and unconsciousness* (Vol. 1). Routledge1.
- 955 Stein, T., & Sterzer, P. (2014). Unconscious processing under interocular suppression:  
956 getting the right measure. *Frontiers in Psychology*, 5, 387.
- 957 Sterzer, P., Hilgenfeldt, T., Freudenberg, P., Bermpohl, F., & Adli, M. (2011). Access of  
958 emotional information to visual awareness in patients with major depressive disorder.  
959 *Psychological Medicine*, 41(8), 1615–1624.
- 960 Sterzer, P., Stein, T., Ludwig, K., Rothkirch, M., & Hesselmann, G. (2014). Neural  
961 processing of visual information under interocular suppression: a critical review.  
962 *Frontiers in Psychology*, 5(MAY), 1–12.
- 963 Stuit, S. M., Paffen, C. L. E., & Van der Stigchel, S. (2023). Prioritization of emotional faces  
964 is not driven by emotional content. *Scientific Reports*, 13(1), 1–9.
- 965 Tsuchiya, N., & Koch, C. (2005). Continuous flash suppression reduces negative  
966 afterimages. *Nature Neuroscience*, 8(8), 1096–1101.
- 967 Tsuchiya, N., Koch, C., Gilroy, L. A., & Blake, R. (2006). Depth of interocular suppression  
968 associated with continuous flash suppression, flash suppression, and binocular rivalry.  
969 *Journal of Vision*, 6(10), 1068–1078.
- 970 van Dam, L. C. J., & van Ee, R. (2006a). The role of saccades in exerting voluntary control in  
971 perceptual and binocular rivalry. *Vision Research*, 46(6-7), 787–799.
- 972 van Dam, L. C. J., & van Ee, R. (2006b). Retinal image shifts, but not eye movements per  
973 se, cause alternations in awareness during binocular rivalry. *Journal of Vision*, 6(11),  
974 1172–1179.
- 975 Wang, G., Alais, D., Blake, R., & Han, S. 'er. (2022). CFS-crafter: An open-source tool for  
976 creating and analyzing images for continuous flash suppression experiments. *Behavior*  
977 *Research Methods*. <https://doi.org/10.3758/s13428-022-01903-7>
- 978 Wilkinson, F., James, T. W., Wilson, H. R., Gati, J. S., Menon, R. S., & Goodale, M. A.  
979 (2000). An fMRI study of the selective activation of human extrastriate form vision areas

- 980 by radial and concentric gratings. *Current Biology: CB*, 10(22), 1455–1458.
- 981 Williams, D., Phillips, G., & Sekuler, R. (1986). Hysteresis in the perception of motion  
982 direction as evidence for neural cooperativity. *Nature*, 324(6094), 253–255.
- 983 Wilson, H. R. (2003). Computational evidence for a rivalry hierarchy in vision. *Proceedings of*  
984 *the National Academy of Sciences of the United States of America*, 100(24), 14499–  
985 14503.
- 986 Yang, E., Zald, D. H., & Blake, R. (2007). Fearful expressions gain preferential access to  
987 awareness during continuous flash suppression. *Emotion*, 7(4), 882–886.
- 988 Zadbood, A., Lee, S.-H., & Blake, R. (2011). Stimulus fractionation by interocular  
989 suppression. *Frontiers in Human Neuroscience*, 5, 135.
- 990 Zhou, G., Zhang, L., Liu, J., Yang, J., & Qu, Z. (2010). Specificity of face processing without  
991 awareness. *Consciousness and Cognition*, 19(1), 408–412.
- 992 Zhou, W., Jiang, Y., He, S., & Chen, D. (2010). Olfaction modulates visual perception in  
993 binocular rivalry. *Current Biology: CB*, 20(15), 1356–1358.
- 994
